# Supplementary material for: Ionizing radiation-dependent and independent phosphorylation of the 32-kDa subunit of replication protein A during mitosis
Source: PubMed Central journal article supplement — Nucleic Acids Res. 2009 Aug 11;37(18):6028–41. doi: 10.1093/nar/gkp605 (PMC2764457; doi:10.1093/nar/gkp605), 2009-08-11

Supplemental Figures

Fig. S1

|              |                |   |   |     |   |   |              |   |   |              |   |   |   |
|--------------|----------------|---|---|-----|---|---|--------------|---|---|--------------|---|---|---|
| kinase assay | Cdk1-cyclin B  | - | + | +   | - | + | +            | - | + | +            | - | + | + |
|              | RPA2wt         | + | - | +   | + | - | +            | + | - | +            | + | - | + |
|              | RPA2-S23A/S29A | + | - | +   | + | - | +            | + | - | +            | + | - | + |
|              | RPA2-S23A      | + | - | +   | + | - | +            | + | - | +            | + | - | + |
|              | RPA2-S29A      | + | - | +   | + | - | +            | + | - | +            | + | - | + |
| Immunoblot:  | cyclin B       |   |   | RPA |   |   | RPA2-(P)-S23 |   |   | RPA2-(P)-S29 |   |   |   |

Supplementary Figures

Fig. S2

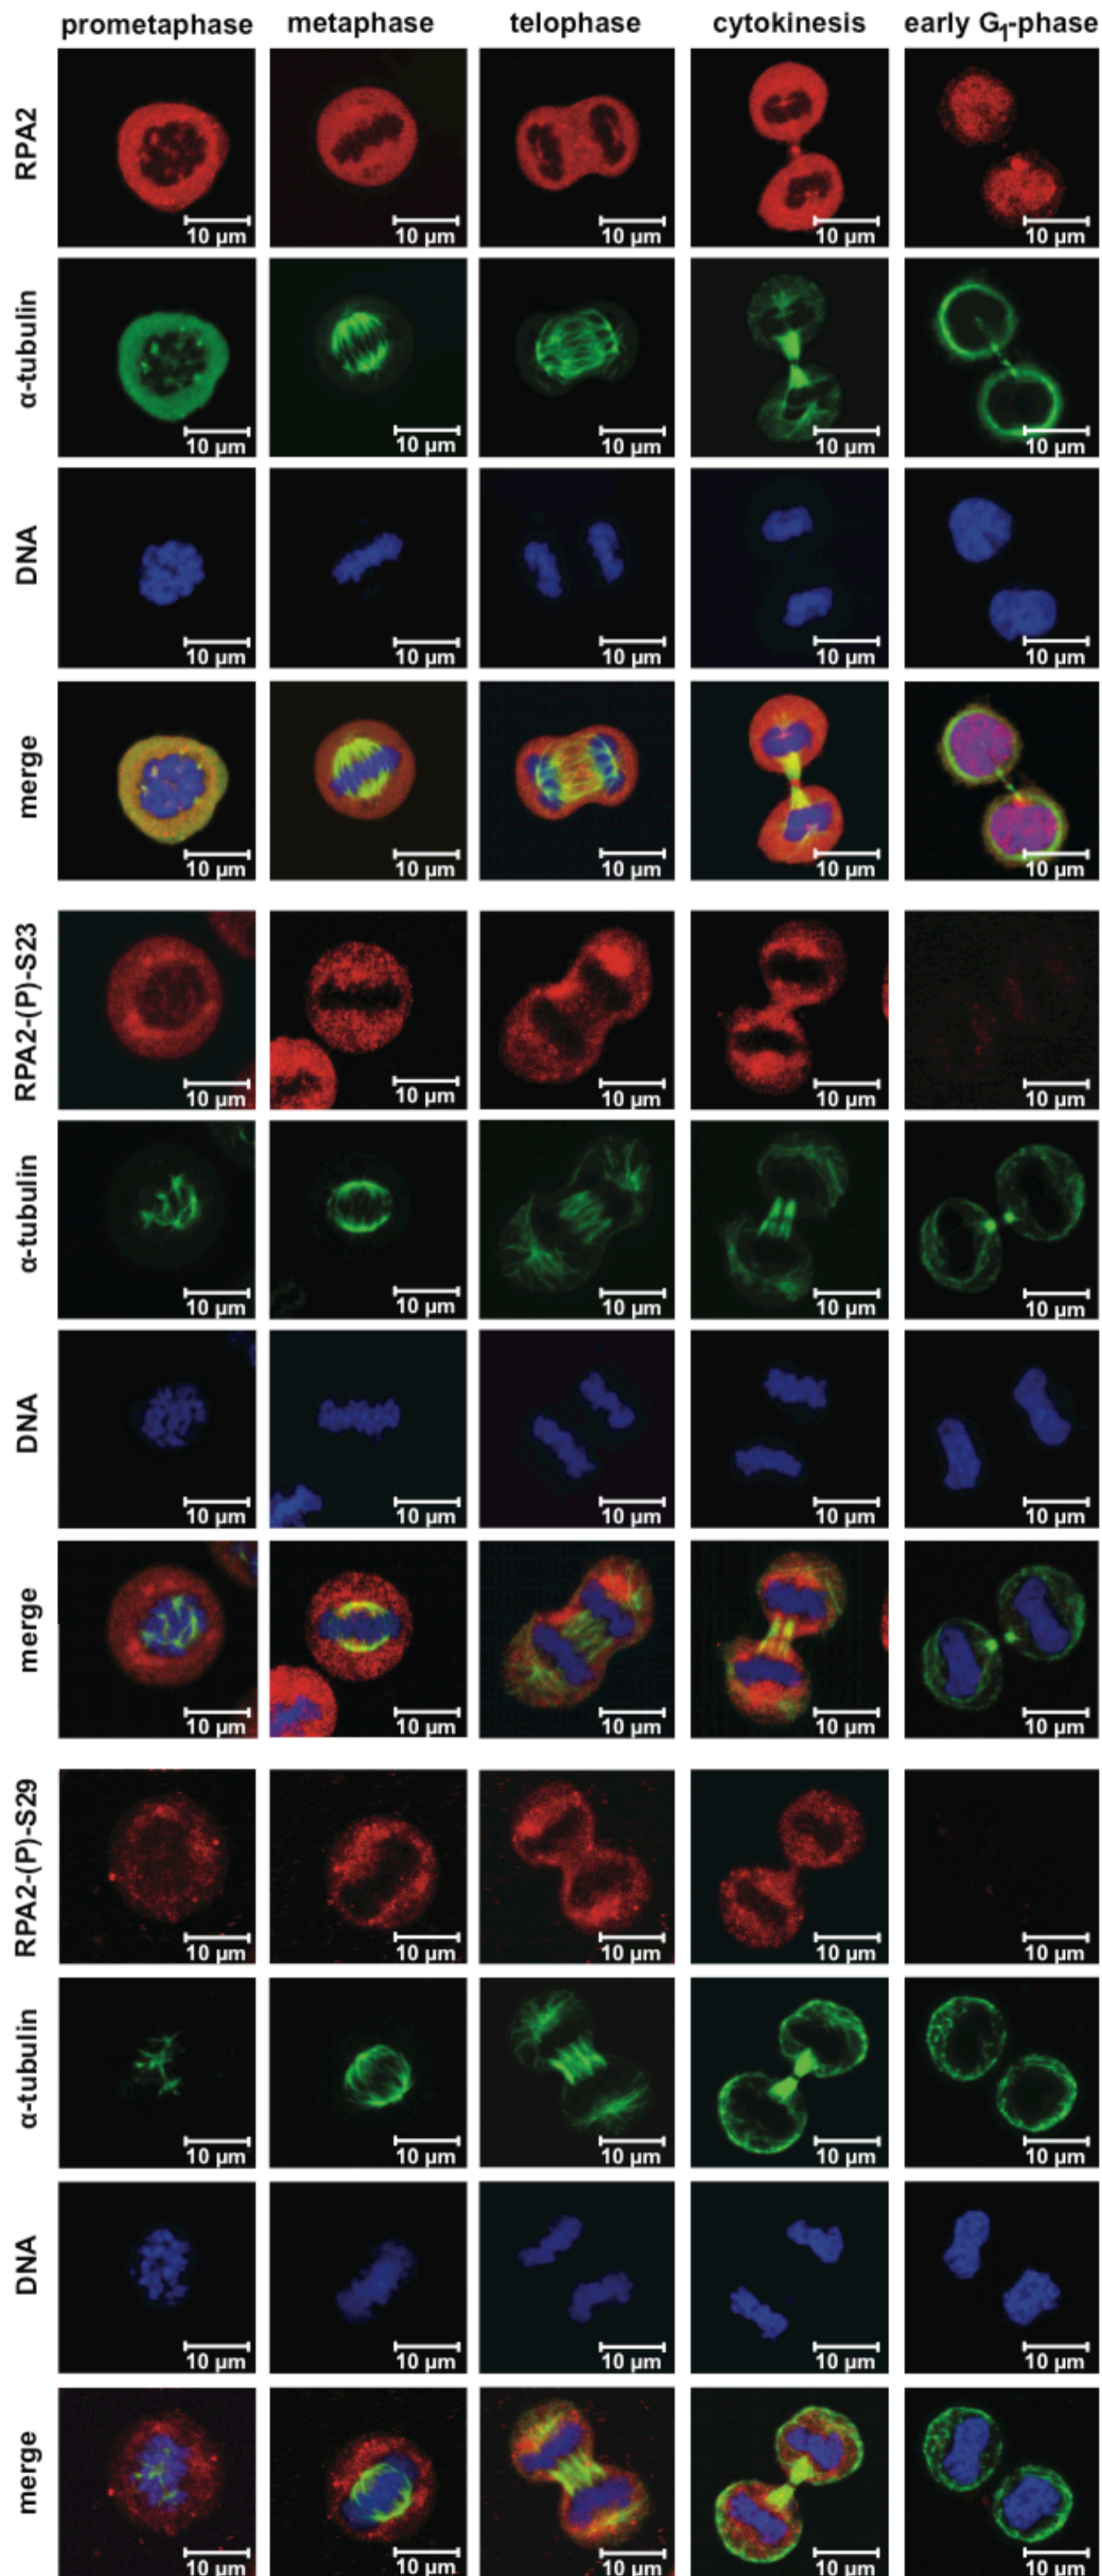





Supplemental Figures

Fig. S4

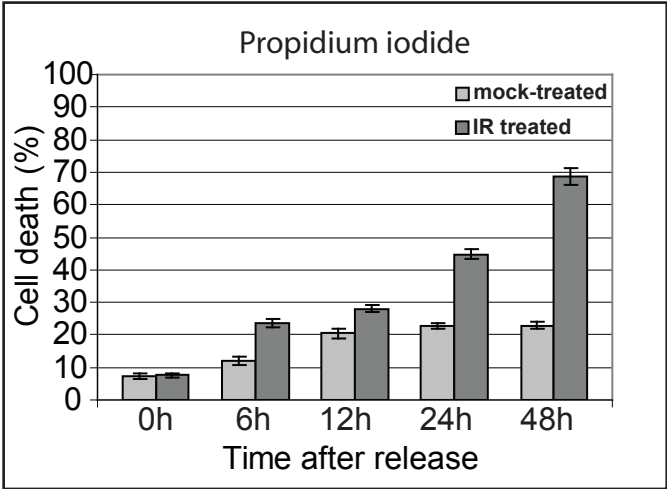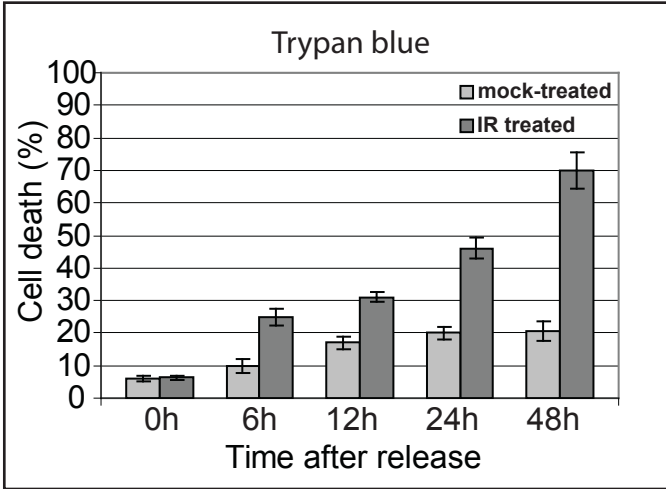

Supplemental Figures

Fig. S5

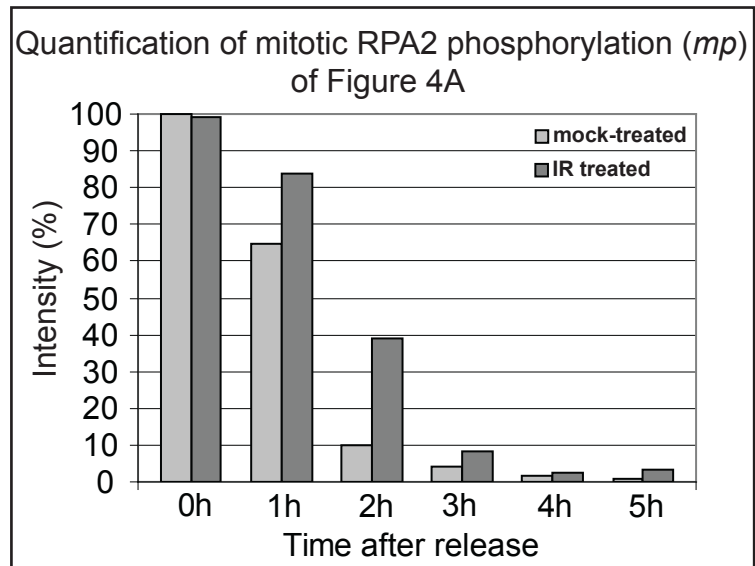

Supplemental Figures

Fig. S6

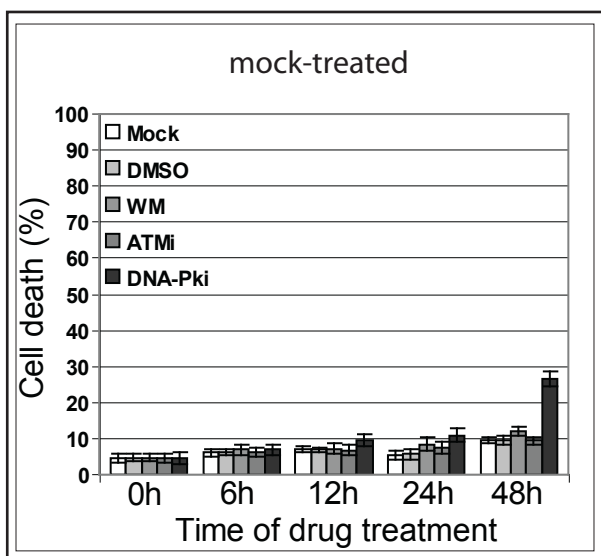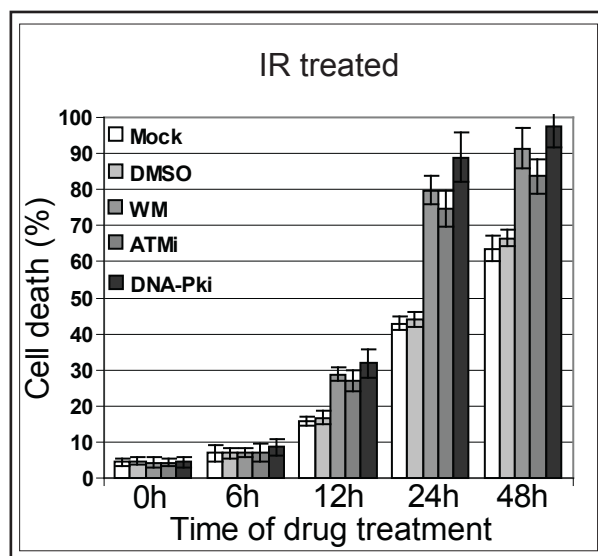

Supplement: gkp605_1.pdf [file gkp605_1.pdf]
